# Supplementary material for: Towards sensitive identification of fluorinated graphdiyne configurations by computational X-ray spectroscopy
Source: Royal Society of Chemistry journal article supplement (doi:10.1039/d4cp04723k), 2025-01-01
Supplement: d4cp04723k1.pdf [file d4cp04723k1.pdf]

**Supplementary Information for: Towards sensitive identification of fluorinated graphdiyne configurations by computational X-ray spectroscopy.**

Hai-Bo Li,<sup>a</sup> Xiu-Neng Song,<sup>a</sup> Chuan-Kui Wang,<sup>a</sup> Weijie Hua,<sup>b</sup> and Yong Ma<sup>a\*</sup>

<sup>a</sup> *School of Physics and Electronics, Shandong Normal University, 250358 Jinan, China.*

<sup>b</sup> *MIIT Key Laboratory of Semiconductor Microstructure and Quantum Sensing, Department of Applied Physics, School of Physics, Nanjing University of Science and Technology, 210094 Nanjing, China.*

\* *Corresponding author. E-mail address: mayong@sdu.edu.cn (Yong Ma)*

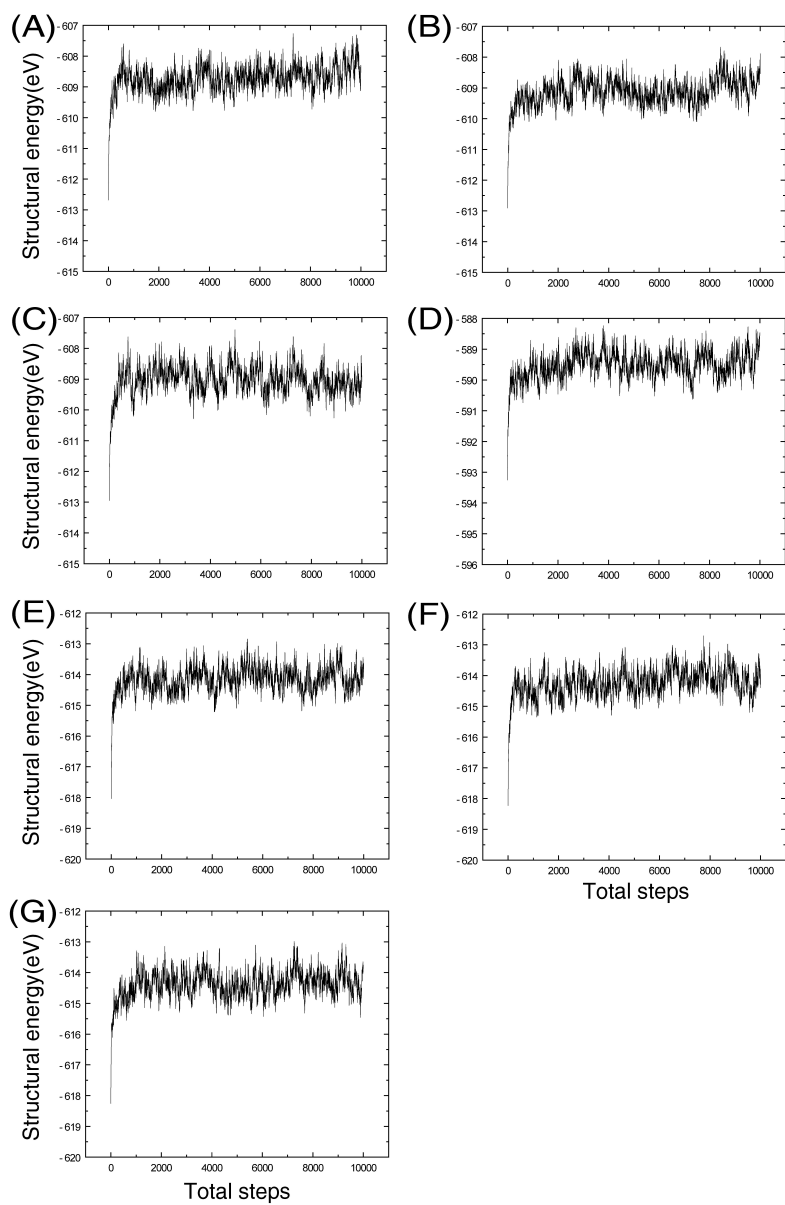

**Figure S1.** The ab initio molecular dynamics (AIMD) production run of seven fluorinated graphdiynes at 300 K, and structural energy of the computational cell on the simulation time after AIMD were shown in the corresponding graph.

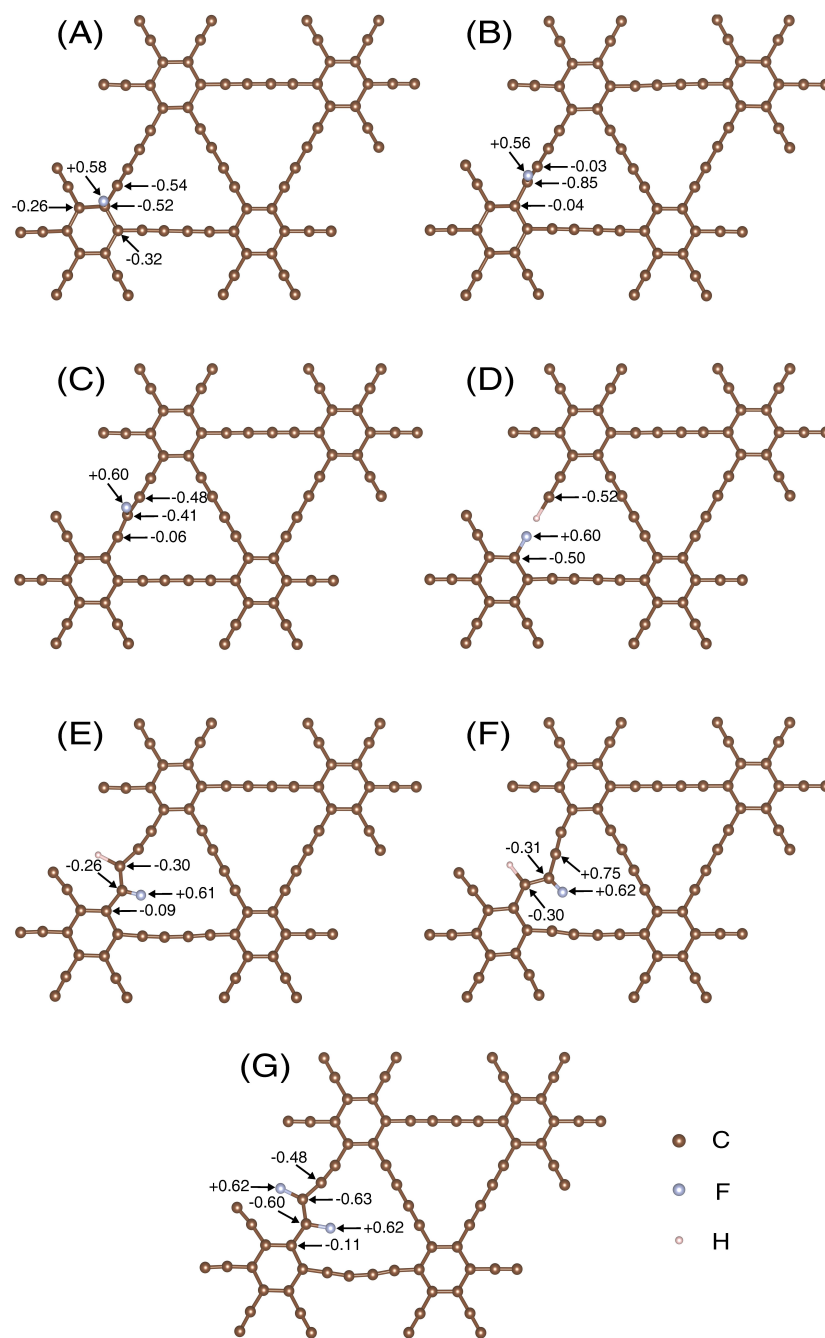

**Figure S2.** Bader effective charge analysis of fluorine atoms and adjacent carbon atoms for all the configurations. Positive and negative values represent

the number of electrons obtained and lost, respectively.
